# Supplementary material for: Phthalide-derived novel fluoroionophores incorporating picolylamino receptors: synthesis and response to metal cations
Source: Royal Society of Chemistry journal article supplement (doi:10.1039/c1an15239d), 2011-01-01
Supplement: c1an15239d.pdf [file c1an15239d.pdf]

## Supplementary Information

# Phthalide-derived novel fluoroionophores incorporating picolylamino receptors: synthesis and response to metal cations

Hideki Okamoto,\* Ayako Matsui, and Kyosuke Satake

Division of Chemistry and Biochemistry, Graduate School of Natural Science and Technology,  
Okayama University, Tsushima-Naka 3-1-1, Kita-ku, Okayama 700-8530, Japan.

E-mail: hokamoto@cc.okayama-u.ac.jp

### Contents

- S2 **Fig. S1**  $^1\text{H}$  NMR spectra of Phthalides **2** and **3**.
- S3 **Fig. S2**  $^{13}\text{C}$  NMR spectra of Phthalides **2** and **3**.
- S3 **Fig. S3** Electronic absorption and fluorescence spectra of phthalides **1-3**.
- S4 **Fig. S4** Effects of  $\text{Zn}^{2+}$  and  $\text{Cu}^{2+}$  on the fluorescence spectra of phthalide **2**.
- S5 **Fig. S5** Effects of  $\text{Zn}^{2+}$  and  $\text{Cu}^{2+}$  on the fluorescence spectra of phthalide **1**.
- S6 **Fig. S6**. Absorption spectra of phthalides **2** and **3** in the presence of metal cations.
- S7 **Table S1**. Absorption and fluorescence spectral data for phthalides **1-3** in MeCN.
- S8 **Table S2**. Association constants of phthalides **2** and **3** with metal cations in MeCN- $\text{H}_2\text{O}$  estimated from fluorescence titration.

S2

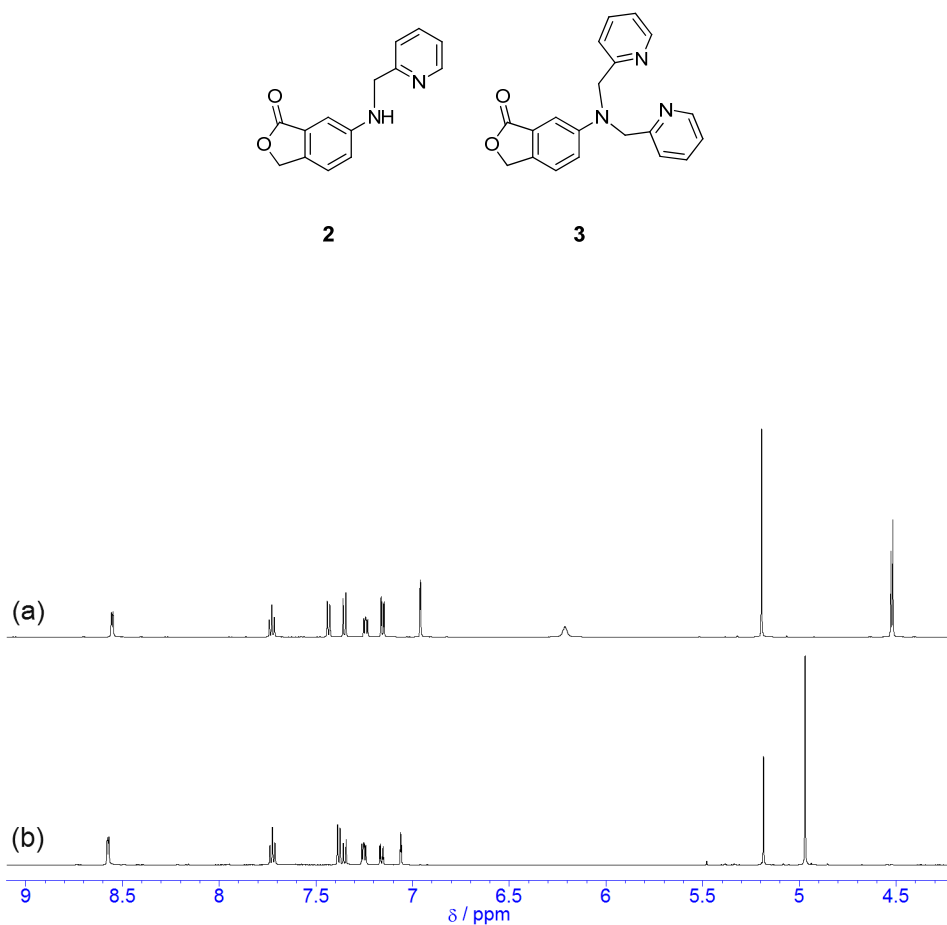

**Fig. S1** <sup>1</sup>H NMR spectra of phthalides (a) **2** and (b) **3** (500 MHz, acetone-d<sub>6</sub>)

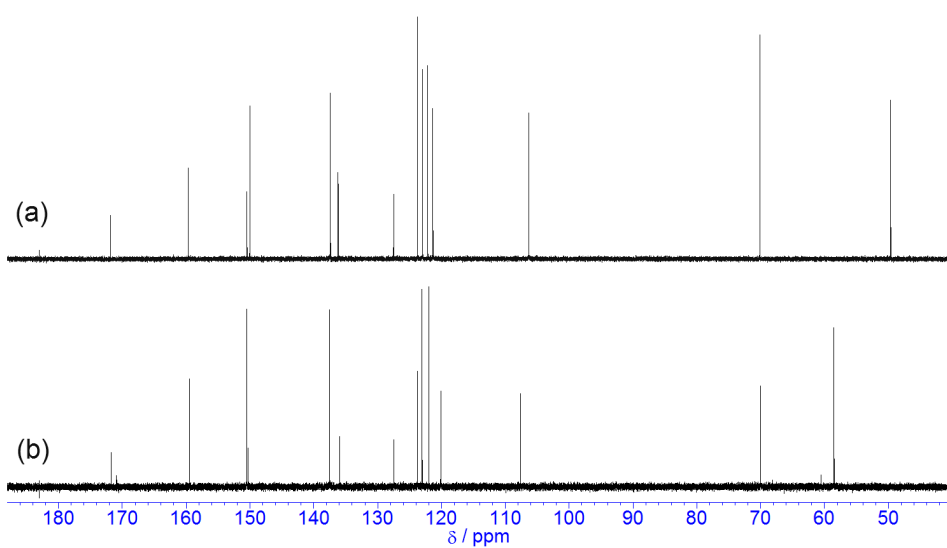

**Fig. S2** <sup>13</sup>C NMR spectra of phthalides (a) **2** and (b) **3** (150 MHz, acetone-d<sub>6</sub>)

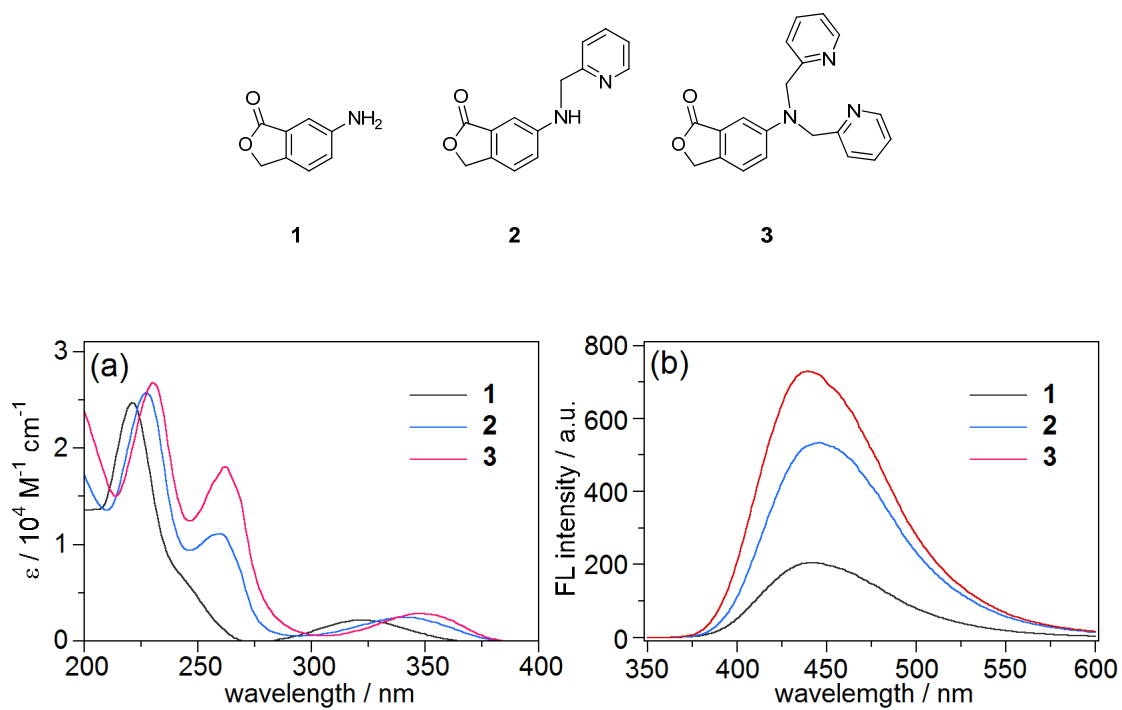

**Fig. S3** Electronic spectra of phthalides **1-3**: (a) Absorption and (b) fluorescence ( $\lambda_{\text{ex}}$  340 nm) spectra in MeCN-H<sub>2</sub>O (30:70).

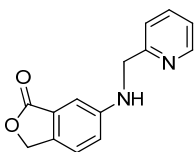

**2**

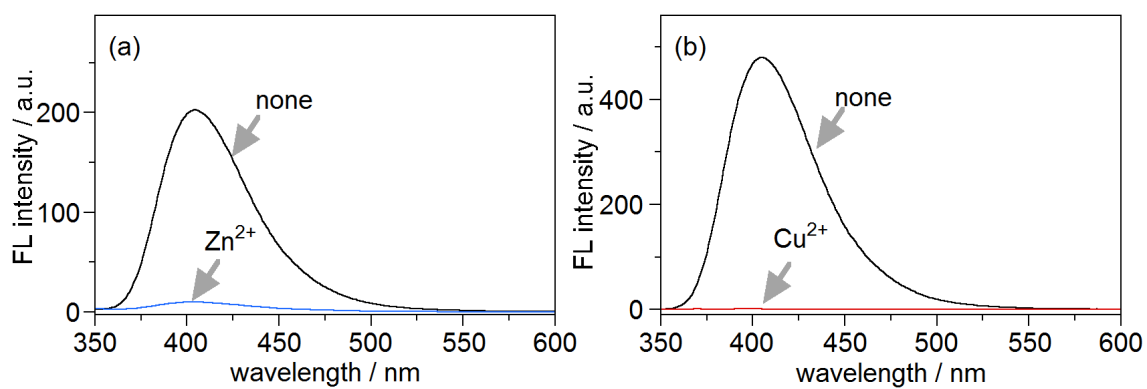

**Fig. S4** Effects of (a)  $\text{Zn}^{2+}$  ( $3.0 \times 10^{-5}$  M)  $\lambda_{\text{ex}}$  307 nm and (b)  $\text{Cu}^{2+}$  ( $6.0 \times 10^{-5}$  M)  $\lambda_{\text{ex}}$  332 nm on the fluorescence spectra of phthalide **2** ( $3.0 \times 10^{-5}$  M) in MeCN.

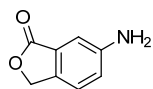

1

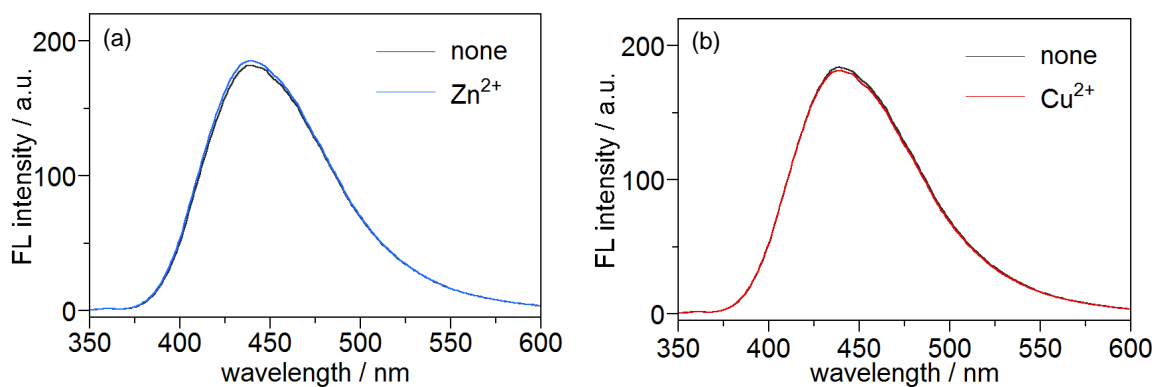

**Fig. S5** Effects of (a)  $\text{Zn}^{2+}$  ( $3.0 \times 10^{-4}$  M)  $\lambda_{\text{ex}}$  304 nm and (b)  $\text{Cu}^{2+}$  ( $3.0 \times 10^{-4}$  M)  $\lambda_{\text{ex}}$  320 nm on the fluorescence spectra of phthalide **1** ( $3.0 \times 10^{-5}$  M) in MeCN- $\text{H}_2\text{O}$  (3 : 7).

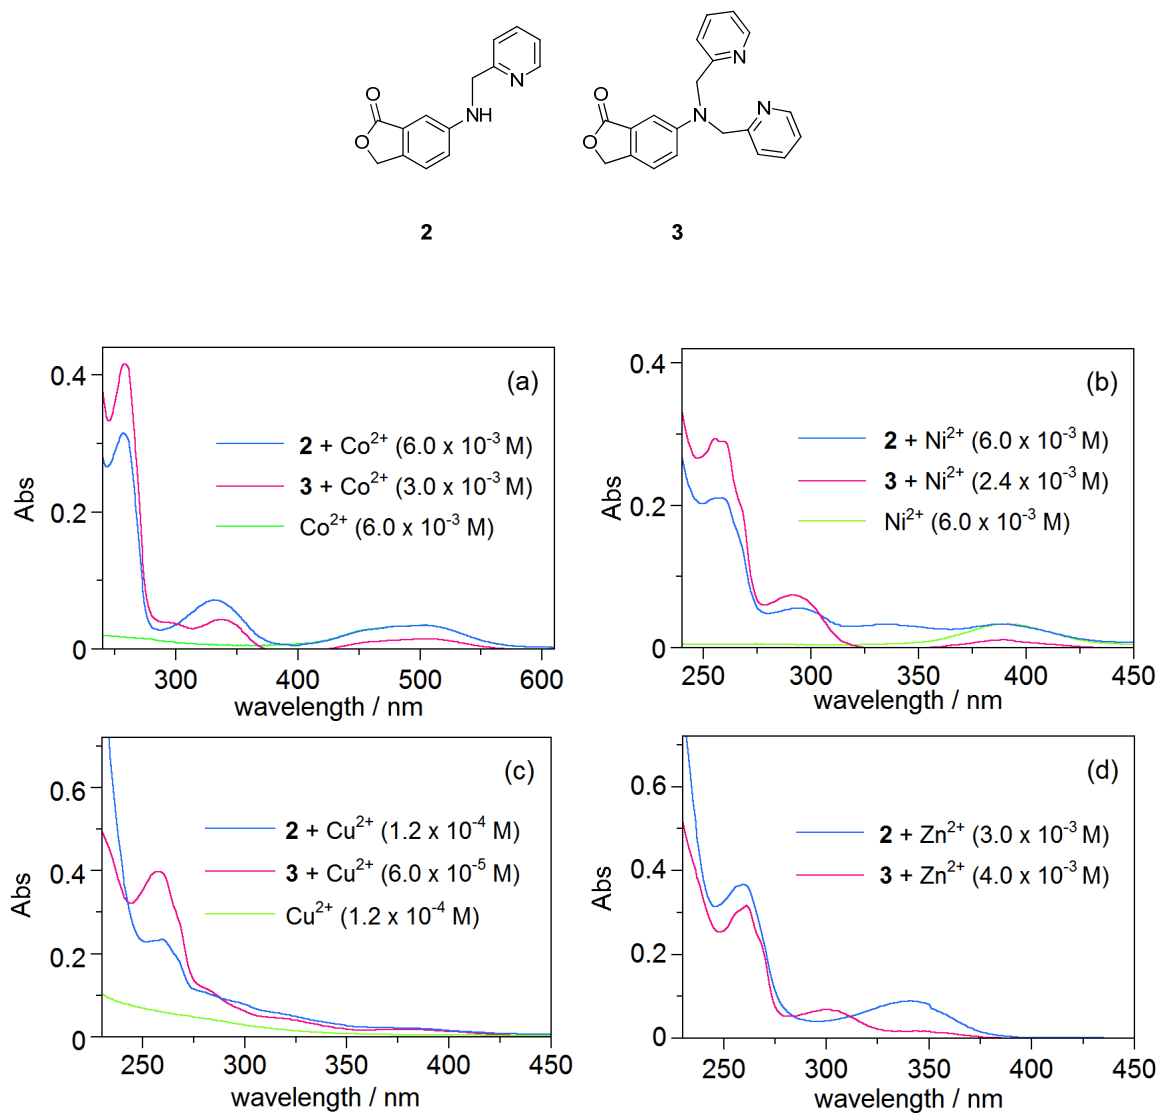

**Fig. S6.** Absorption spectra of phthalides **2** and **3** ( $3.0 \times 10^{-5}$  M) in the presence of (a) Co<sup>2+</sup>, (b) Ni<sup>2+</sup>, (c) Cu<sup>2+</sup> and (d) Zn<sup>2+</sup> in MeCN-H<sub>2</sub>O (3 : 7), (cf. Figs. 2 and 3)

**Table S1.** Absorption and fluorescence spectral data for phthalides **1-3** in MeCN<sup>a</sup>

| Compd    | $\lambda_{\text{max}}^{\text{Abs}} / \text{nm}$<br>(log $\epsilon$ ) | $\lambda_{\text{max}}^{\text{FL}} / \text{nm}$ | $\Phi_{\text{F}}^b$ |
|----------|----------------------------------------------------------------------|------------------------------------------------|---------------------|
| <b>1</b> | 328<br>(3.44)                                                        | 394                                            | 0.47                |
| <b>2</b> | 340<br>(3.47)                                                        | 404                                            | 0.43                |
| <b>3</b> | 345<br>(3.40)                                                        | 409                                            | 0.37                |

<sup>a</sup> Measured under aerated conditions.

<sup>b</sup>  $\Phi_{\text{F}}$ : fluorescence quantum yield, errors  $\leq 10\%$ .

**Table S2.** Association constant ( $K_{11}$ ) of phthalides **2** and **3** with metal cations in MeCN-H<sub>2</sub>O (30:70) estimated from the fluorescence titration (cf. Fig. 4)

| Compd    | $K_{11} / \text{M}^{-1}$    |                             |                             |                             |
|----------|-----------------------------|-----------------------------|-----------------------------|-----------------------------|
|          | Co <sup>2+</sup>            | Ni <sup>2+</sup>            | Cu <sup>2+</sup>            | Zn <sup>2+</sup>            |
| <b>2</b> | $2.4 (\pm 0.8) \times 10^2$ | $2.6 (\pm 0.3) \times 10^2$ | $1.2 (\pm 0.1) \times 10^4$ | — <sup>a</sup>              |
| <b>3</b> | $1.1 (\pm 0.1) \times 10^3$ | $9.3 (\pm 0.7) \times 10^4$ | $\sim 8 \times 10^6$        | $1.0 (\pm 0.1) \times 10^3$ |

<sup>a</sup>No appreciable change in the fluorescence spectra was observed (cf. Fig. 2h).
